# Supplementary material for: Identification and validation of key biomarkers associated with macrophages in nonalcoholic fatty liver disease based on hdWGCNA and machine learning
Source: publisher site journal article supplement (doi:10.18632/aging.205374), 2023-12-21
Supplement: Supplementary file [file aging-v15i24-205374-supplementary-material-SD2.pdf]

## SUPPLEMENTARY TABLE

**Supplementary Table 1. The primers designed for RT-qPCR.**

| <b>Gene</b>          | <b>Primer</b>            |
|----------------------|--------------------------|
| Mus-Actin (Forward)  | TCCTTCCTGGGCATGGAG       |
| Mus-Actin (Reverse)  | AGGAGGAGCAATGATCTTGATCTT |
| Mus-MAFB (Forward)   | TGAATTTGCTGGCACTGCTG     |
| Mus-MAFB (Reverse)   | AAGCACCATGCGGTTTCATACA   |
| Mus-CX3CR1 (Forward) | CAGCATCGACCGGTACCTT      |
| Mus-CX3CR1 (Reverse) | GCTGCACTGTCCGGTTGTT      |
